# Supplementary material for: Comparative Histology of C Thyrocytes in Four Domestic Animal Species: Dog, Pig, Horse, and Cattle
Source: MDPI journal article supplement (doi:10.3390/ani12101324), 2022-05-23
Supplement: s1 [file s1]

**Supplementary Table S1.** Fraction of C thyrocytes in three different regions of the medial part of canine thyroid lobe and total fraction of C thyrocytes in examined cases.

| Case no.     | Fraction of C thyrocytes (%)   |                                 |                                            | Total fraction of C thyrocytes per case (%) |
|--------------|--------------------------------|---------------------------------|--------------------------------------------|---------------------------------------------|
|              | Superficial area               | Central area                    | Intermediate area                          |                                             |
|              | Mean±SD<br>(Range of values)   | Mean±SD<br>(Range of values)    | Mean±SD<br>(Range of values)               |                                             |
| 1            | 1.61±3.22<br>(0-8.21)          | 18.71±13.51<br>(0-44.75)        | 12.68±10.39 <sup>c</sup><br>(0-35.87)      | 13.15±12.12                                 |
| 2            | 1.31±2.85<br>(0-10.26)         | 11.18±9.34<br>(0-25)            | 6.09±7.11 <sup>b</sup><br>(0-21.58)        | 7.17±7.93                                   |
| 3            | 2.32±4.69<br>(0-14.03)         | 11.57±6.29<br>(0-22.81)         | 5.16±5.41 <sup>c</sup><br>(0-15.93)        | 7.04±6.64                                   |
| 4            | 2.03±4.76<br>(0-17.08)         | 8.19±4.43<br>(0-22.18)          | 5.70±7.15 <sup>b</sup><br>(0-22.18)        | 6±6.02                                      |
| 5            | 1.8±2.76<br>(0-7.59)           | 11.58±5.98<br>(0-23.65)         | 6.07±4.96 <sup>c</sup><br>(0-15.35)        | 7.63±6.16                                   |
| 6            | 0.65±2.18<br>(0-8.2)           | 8.26±7.13<br>(0-22.52)          | 5.84±6.44 <sup>b</sup><br>(0-14.18)        | 5.48±6.41                                   |
| 7            | 1.77±5.42<br>(0-14.91)         | 6.67±5.4<br>(0-13.79)           | 5.56±6.17 <sup>b</sup><br>(0-19.2)         | 5.36±5.42                                   |
| 8            | 4.02±8.86<br>(0-31.64)         | 17.73±11.79<br>(0-33.16)        | 13.87±12.6 <sup>b</sup><br>(0-40.27)       | 14.28±12.39                                 |
| 9            | 4.27±6.33<br>(0-19.28)         | 19.71±10.61<br>(0-34.87)        | 13.34±15.39 <sup>b</sup><br>(0-44.21)      | 14.44±12.83                                 |
| 10           | 2.87±5.13<br>(0-15.24)         | 17.57±6<br>(5.55-23.98)         | 10.72±7.67 <sup>c</sup><br>(3.24-30.34)    | 10.4±8.68                                   |
| 11           | 3.9±5.42<br>(0-16.23)          | 16.64±9.8<br>(0-35.18)          | 11.87±10.62 <sup>b</sup><br>(0-33.15)      | 11.31±10.19                                 |
| 12           | 0.77±1.93<br>(0-6.9)           | 14.68±12.47<br>(1.82-43.48)     | 6.85±5.89 <sup>c</sup><br>(0-16.78)        | 7.78±9.73                                   |
| 13           | 1.95±4.39<br>(0-16.11)         | 11.04±6.27<br>(3.12-25.87)      | 5.17±5.92 <sup>c</sup><br>(0-18.63)        | 6.63±6.65                                   |
| 14           | 1.62±3.1<br>(0-10.13)          | 7.4±5.74<br>(0-17.51)           | 6.88±5.99 <sup>b</sup><br>(0-16.72)        | 5.87±5.65                                   |
| 15           | 0.67±1.78<br>(0-6.67)          | 5.45±5.83<br>(0-19.34)          | 4.68±5.19 <sup>b</sup><br>(0-15.42)        | 3.97±4.98                                   |
| 16           | 1.14±1.58<br>(0-4.69)          | 9.89±5.83<br>(0-19.11)          | 3.97±4.22 <sup>c</sup><br>(0-12.96)        | 5.75±5.52                                   |
| 17           | 10.10±10.74<br>(0-35.33)       | 19.23±9.14<br>(0-32.48)         | 17.21±15.61<br>(0-47.18)                   | 17.69±12.49                                 |
| 18           | 2.64±3.31<br>(0-11.8)          | 11.75±8.68<br>(0-29.9)          | 6.94±4.91 <sup>b</sup><br>(0-17.35)        | 8.20±7.01                                   |
| 19           | 2.95±5.56<br>(0-18.14)         | 13.34±11.06<br>(0-29.12)        | 12.63±11.7 <sup>a</sup><br>(0-33.93)       | 11.6±10.72                                  |
| 20           | 2.69±7.45<br>(0-26.97)         | 9.09±9.8<br>(0-31.79)           | 7.28±9.12<br>(0-31)                        | 7.68±9.05                                   |
| <b>Total</b> | <b>2.55±5.32<br/>(0-35.33)</b> | <b>12.48±9.42<br/>(0-44.75)</b> | <b>8.43±9.29<sup>c</sup><br/>(0-47.18)</b> | <b>8.87±3.72</b>                            |

Letters in the same line indicate statistically significant differences between all values: a -  $p \leq 0.5$ ; b -  $p \leq 0.01$ ; c -  $p \leq 0.001$ .

**Supplementary Table S2.** Fraction of C thyrocytes in three different regions of the medial part of porcine thyroid lobe and total fraction of C thyrocytes in examined cases.

| Case no.     | Fraction of C thyrocytes (%)   |                                 |                                            | Total fraction of C thyrocytes per case (%) |
|--------------|--------------------------------|---------------------------------|--------------------------------------------|---------------------------------------------|
|              | Superficial area               | Central area                    | Intermediate area                          |                                             |
|              | Mean±SD<br>(Range of values)   | Mean±SD<br>(Range of values)    | Mean±SD<br>(Range of values)               |                                             |
| 1            | 2.72±2.79<br>(0-9.17)          | 8.39±4.07<br>(2.4-14.46)        | 6.64±3.48 <sup>b</sup><br>(0-11.34)        | 5.85±4.16                                   |
| 2            | 2.87±2.29<br>(0-6.42)          | 7.45±3.13<br>(0-12.06)          | 5.15±2.85 <sup>b</sup><br>(0-9.45)         | 5.37±3.31                                   |
| 3            | 4.81±7.46<br>(0-26.09)         | 10.96±5.64<br>(0-20)            | 10.65±7.82 <sup>a</sup><br>(0-24.17)       | 8.77±7.44                                   |
| 4            | 3.98±6.26<br>(0-18.57)         | 9.55±4.05<br>(2.63-15.93)       | 7.35±4.4 <sup>a</sup><br>(0-14)            | 7.27±5.4                                    |
| 5            | 2.46±2.97<br>(0-8.44)          | 12.46±5.94<br>(0-21.36)         | 9.14±4.29 <sup>c</sup><br>(3.61-18.95)     | 8.72±6.13                                   |
| 6            | 5.07±6.56<br>(0-19.58)         | 15.08±4.3<br>(9.09-24.32)       | 9.27±5.46 <sup>c</sup><br>(0-20)           | 9.89±6.8                                    |
| 7            | 10.51±6.79<br>(0-22.22)        | 19.04±4.9<br>(10.45-27.71)      | 13.73±7.45 <sup>b</sup><br>(1.09-23.08)    | 14.59±7.24                                  |
| 8            | 3.71±4.8<br>(0-15.46)          | 11.3±4.34<br>(5.17-19.150)      | 6.41±3 <sup>b</sup><br>(2.06-11.94)        | 7.59±5.12                                   |
| 9            | 3.18±4.57<br>(0-13.33)         | 12.13±4.11<br>(5.22-19.01)      | 8.94±4.24 <sup>b</sup><br>(3.70-16.67)     | 8.15±5.63                                   |
| 10           | 3.51±3.98<br>(0-9.34)          | 12.14±7.01<br>(2.35-29.09)      | 6.89±5.17 <sup>b</sup><br>(0-17.65)        | 7.91±6.48                                   |
| 11           | 2.69±2.96<br>(0-8.51)          | 11.67±3.52<br>(5.55-16.16)      | 8.28±6.03 <sup>c</sup><br>(0.83-20.34)     | 7.32±5.68                                   |
| 12           | 2.94±3.28<br>(0-10.2)          | 9.84±4.18<br>(1.64-15.79)       | 5.27±3.09 <sup>c</sup><br>(0-10.18)        | 6.15±4.52                                   |
| 13           | 6.73±6.06<br>(0-19.86)         | 17.41±6.04<br>(4.22-26.09)      | 13.75±6.27 <sup>c</sup><br>(0-23.33)       | 12.94±7.47                                  |
| 14           | 3.52±4.46<br>(0-14.28)         | 10.11±4.06<br>(4.54-20)         | 6.87±3.08 <sup>c</sup><br>(0-12.17)        | 6.79±4.69                                   |
| 15           | 1.98±2.89<br>(0-8.28)          | 9.39±5.63<br>(0-18.96)          | 6.76±5.42 <sup>b</sup><br>(0-16.85)        | 6±5.63                                      |
| 16           | 3.28±5.13<br>(0-15.79)         | 12.58±3.76<br>(6.56-22.58)      | 6.76±2.8 <sup>c</sup><br>(0.93-11.54)      | 7.78±5.51                                   |
| 17           | 8.80±7.67<br>(0-24.56)         | 18.05±4.47<br>(12.93-26.73)     | 12.37±4.77 <sup>b</sup><br>(1.39-20.45)    | 13.14±6.86                                  |
| 18           | 4.64±4.46<br>(0-13.33)         | 11.46±5.34<br>(0-22.82)         | 9±5.69 <sup>b</sup><br>(0-22.06)           | 8.63±5.86                                   |
| 19           | 0.80±1.85<br>(0-6.78)          | 3.60±3.5<br>(0-11.63)           | 3.48±3.13 <sup>c</sup><br>(0-8.89)         | 2.82±3.16                                   |
| 20           | 1.96±4.17<br>(0-18.05)         | 5.21±4.99<br>(0-17.81)          | 3.48±3.55 <sup>a</sup><br>(0-10)           | 3.91±4.43                                   |
| <b>Total</b> | <b>3.81±5.12<br/>(0-26.09)</b> | <b>10.79±6.15<br/>(0-29.09)</b> | <b>7.66±5.49<sup>c</sup><br/>(0-24.17)</b> | <b>7.98±2.94</b>                            |

Letters in the same line indicate statistically significant differences between all values: a -  $p \leq 0.5$ ; b -  $p \leq 0.01$ ; c -  $p \leq 0.001$ .

**Supplementary Table S3.** Fraction of C thyrocytes in three different regions of the medial part of equine thyroid lobe and total fraction of C thyrocytes in examined cases.

| Case no.     | Fraction of C thyrocytes (%)   |                                |                                         | Total fraction of C thyrocytes per case (%) |
|--------------|--------------------------------|--------------------------------|-----------------------------------------|---------------------------------------------|
|              | Superficial area               | Central area                   | Intermediate area                       |                                             |
|              | Mean±SD<br>(Range of values)   | Mean±SD<br>(Range of values)   | Mean±SD<br>(Range of values)            | Mean±SD                                     |
| 1            | 0.72±1.62<br>(0-5.49)          | 6.12±5.14<br>(0-15.23)         | 6.45±4.93 <sup>c</sup><br>(0-16.91)     | 4.23±4.9                                    |
| 2            | 3.87±5.21<br>(0-15.73)         | 15.00±8.29<br>(0-25.66)        | 9.02±7.06 <sup>b</sup><br>(0-22.01)     | 8.66±8.21                                   |
| 3            | 0.12±0.46<br>(0-1.72)          | 6.37±8.06<br>(0-20.45)         | 7.66±9.46 <sup>a</sup><br>(0-27.84)     | 4.5±7.75                                    |
| 4            | 4.77±6.79<br>(0-27.69)         | 16.91±9.34<br>(0-32.78)        | 17.17±9.98 <sup>c</sup><br>(0-39.34)    | 12.72±10.47                                 |
| 5            | 1.42±4.35<br>(0-20.49)         | 9.33±6.65<br>(0-25.47)         | 10.08±6.17 <sup>c</sup><br>(0-25.79)    | 6.76±6.96                                   |
| 6            | 0.34±1.43<br>(0-7.33)          | 6.52±6.76<br>(0-29.05)         | 3.51±3.9 <sup>c</sup><br>(0-12.21)      | 3.58±5.19                                   |
| 7            | 0.67±1.8<br>(0-7.36)           | 7.94±7.13<br>(0-25.9)          | 6.86±8.33 <sup>c</sup><br>(0-28.69)     | 4.63±7.11                                   |
| 8            | 2.46±3.93<br>(0-15.62)         | 12.29±5.64<br>(2.21-24.31)     | 8.40±7.22 <sup>c</sup><br>(0-23.56)     | 7.54±6.99                                   |
| 9            | 0.76±2.53<br>(0-12.62)         | 8.67±7.05<br>(0-25.81)         | 5.58±5.98 <sup>c</sup><br>(0-20)        | 4.61±6.37                                   |
| 10           | 0.43±1.56<br>(0-7.63)          | 3.24±2.43<br>(0-9.66)          | 2.74±2.5 <sup>c</sup><br>(0-9.24)       | 2.26±2.5                                    |
| 11           | 0.77±1.96<br>(0-8.26)          | 5.85±5.06<br>(0-21.59)         | 3.32±3.44 <sup>c</sup><br>(0-12.62)     | 3.26±4.22                                   |
| 12           | 1.53±2.51<br>(0-10.11)         | 8.20±4.75<br>(0-18.56)         | 6.65±5.46 <sup>c</sup><br>(0-18.93)     | 5.51±5.23                                   |
| 13           | 0.60±1.76<br>(0-8.26)          | 4.54±4.15<br>(0-21.59)         | 3.03±2.99 <sup>c</sup><br>(0-12.62)     | 2.73±3.51                                   |
| 14           | 0.78±3.13<br>(0-15.62)         | 10.89±9.38<br>(0-9.38)         | 8.70±8.68 <sup>c</sup><br>(0-25.31)     | 6.04±8.69                                   |
| 15           | 1.35±3.64<br>(0-13.33)         | 9.98±9.11<br>(0-30.23)         | 9.24±10.6 <sup>c</sup><br>(0-36.78)     | 6.29±9.13                                   |
| 16           | 2.03±3.18<br>(0-15.11)         | 8.89±4.88<br>(0-20.95)         | 6.53±6.12 <sup>c</sup><br>(0-22.3)      | 5.84±5.6                                    |
| 17           | 2.57±6.06<br>(0-22.22)         | 13.68±9.64<br>(0-33.02)        | 8.66±8.37 <sup>c</sup><br>(0-28.45)     | 8.33±9.27                                   |
| 18           | 4.40±5.79<br>(0-16.95)         | 12.61±10.89<br>(0-33.67)       | 14.38±12.13 <sup>c</sup><br>(0-42.46)   | 9.30±10.79                                  |
| 19           | 0.79±2.68<br>(0-12.42)         | 7.90±7.66<br>(0-27.34)         | 10.21±8.75 <sup>c</sup><br>(0-24.69)    | 6.28±7.91                                   |
| 20           | 1.77±2.77<br>(0-7.84)          | 5.53±3.25<br>(0-9.95)          | 3.58±2.63 <sup>a</sup><br>(0-7.22)      | 3.61±3.22                                   |
| <b>Total</b> | <b>1.55±3.73<br/>(0-27.69)</b> | <b>8.87±7.78<br/>(0-33.67)</b> | <b>7.44±8<sup>c</sup><br/>(0-42.46)</b> | <b>5.83±2.56</b>                            |

Letters in the same line indicate statistically significant differences between all values: a -  $p \leq 0.5$ ; b -  $p \leq 0.01$ ; c -  $p \leq 0.001$ .

**Supplementary Table S4.** Fraction of C thyrocytes in three different regions of the medial part of bovine thyroid lobe and total fraction of C thyrocytes in examined cases.

| Case no.     | Fraction of C thyrocytes (%)  |                                 |                                             | Total fraction of C thyrocytes per case (%) |
|--------------|-------------------------------|---------------------------------|---------------------------------------------|---------------------------------------------|
|              | Superficial area              | Central area                    | Intermediate area                           |                                             |
|              | Mean±SD<br>(Range of values)  | Mean±SD<br>(Range of values)    | Mean±SD<br>(Range of values)                | Mean±SD                                     |
| 1            | 1.56±3<br>(0-10.26)           | 11.94±5.91<br>(0-19.8)          | 8.61±6.32 <sup>c</sup><br>(0-20.89)         | 7.15±6.81                                   |
| 2            | 3.73±4.94<br>(0-18.45)        | 14.81±7.14<br>(0-23.73)         | 13.70±5.82 <sup>c</sup><br>(0-25.49)        | 10.04±7.79                                  |
| 3            | 5.48±7.27<br>(0-26.13)        | 14.05±8.25<br>(0-25)            | 14.24±6.59 <sup>c</sup><br>(0-24.49)        | 10.97±8.39                                  |
| 4            | 1.33±2.17<br>(0-8.84)         | 16.18±7.44<br>(0-24.72)         | 13.61±8.38 <sup>c</sup><br>(0-32.17)        | 9.93±9.21                                   |
| 5            | 1.56±4.34<br>(0-20.26)        | 14.75±9.64<br>(0-27.47)         | 12.10±8.99 <sup>c</sup><br>(0-28.19)        | 8.63±9.77                                   |
| 6            | 2.58±3.01<br>(0-11.16)        | 10.19±5.06<br>(1.51-22.84)      | 9.01±4.97 <sup>c</sup><br>(0.51-20.22)      | 7.18±5.53                                   |
| 7            | 2.68±4.54<br>(0-17.24)        | 9.95±7.26<br>(0-30.61)          | 10.71±6.55 <sup>c</sup><br>(0-24.12)        | 7.15±7.15                                   |
| 8            | 1.66±3.88<br>(0-18.44)        | 12.47±5.41<br>(2.35-23.65)      | 8.61±4.75 <sup>c</sup><br>(0-15.58)         | 7.37±6.48                                   |
| 9            | 1.23±1.6<br>(0-5.64)          | 8.10±5.76<br>(0-22.1)           | 5.82±3.64 <sup>c</sup><br>(0-12.8)          | 4.71±4.92                                   |
| 10           | 2.14±4.66<br>(0-18.78)        | 12.02±9.01<br>(0-26.44)         | 10.26±8.09 <sup>c</sup><br>(0-23.98)        | 9.23±8.61                                   |
| 11           | 1.79±3.81<br>(0-17.09)        | 12.04±6.83<br>(0-26.36)         | 10.30±7.04 <sup>c</sup><br>(0-28.39)        | 7.66±7.52                                   |
| 12           | 4.28±7.07<br>(0-26.67)        | 14.33±12.62<br>(0-32.57)        | 12.65±11.13 <sup>b</sup><br>(0-34.74)       | 9.28±11.34                                  |
| 13           | 0.38±0.58<br>(0-1.82)         | 10.96±8.46<br>(0-21.69)         | 4.25±4.37 <sup>c</sup><br>(0-11.84)         | 4.75±6.96                                   |
| 14           | 3.90±5.02<br>(0-13.04)        | 11.44±6.31<br>(0-21.78)         | 8.12±6.25 <sup>a</sup><br>(0-19.12)         | 7.61±6.54                                   |
| 15           | 3.95±4.09<br>(0-11.58)        | 19.43±4.46<br>(12.59-26.36)     | 13.05±6.41 <sup>c</sup><br>(1-21.55)        | 11.51±8.12                                  |
| 16           | 2.61±4.95<br>(0-17.16)        | 9.46±6.04<br>(0-23.56)          | 11.48±7.2 <sup>b</sup><br>(0-25)            | 7.30±7.11                                   |
| 17           | 4.38±4.38<br>(0-12.43)        | 15.94±3.76<br>(11.32-26.31)     | 12.15±5.96 <sup>c</sup><br>(2.63-24.21)     | 10.55±6.75                                  |
| 18           | 2.10±4.38<br>(0-14.75)        | 15.05±3.36<br>(9.28-24.56)      | 10.63±6.43 <sup>c</sup><br>(0.78-20.89)     | 8.63±7.24                                   |
| 19           | 4.03±5.35<br>(0-18.42)        | 12.36±7.39<br>(0-25.19)         | 10.84±4.48 <sup>b</sup><br>(0.73-16.57)     | 9.06±6.8                                    |
| 20           | 3.55±6.5<br>(0-18.18)         | 20.90±5.03<br>(12.57-28.57)     | 14.29±7.83 <sup>c</sup><br>(0-23.39)        | 12.87±9.65                                  |
| <b>Total</b> | <b>2.62±4.7<br/>(0-26.67)</b> | <b>12.96±7.97<br/>(0-32.57)</b> | <b>10.75±7.43<sup>c</sup><br/>(0-34.74)</b> | <b>8.58±2.08</b>                            |

Letters in the same line indicate statistically significant differences between all values: a -  $p \leq 0.5$ ; b -  $p \leq 0.01$ ; c -  $p \leq 0.001$ .
